# Supplementary material for: A Novel Miniaturized Biosensor for Monitoring Atlantic Salmon Swimming Activity and Respiratory Frequency
Source: MDPI journal article supplement (doi:10.3390/ani11082403), 2021-08-14
Supplement: s1 [file s1]

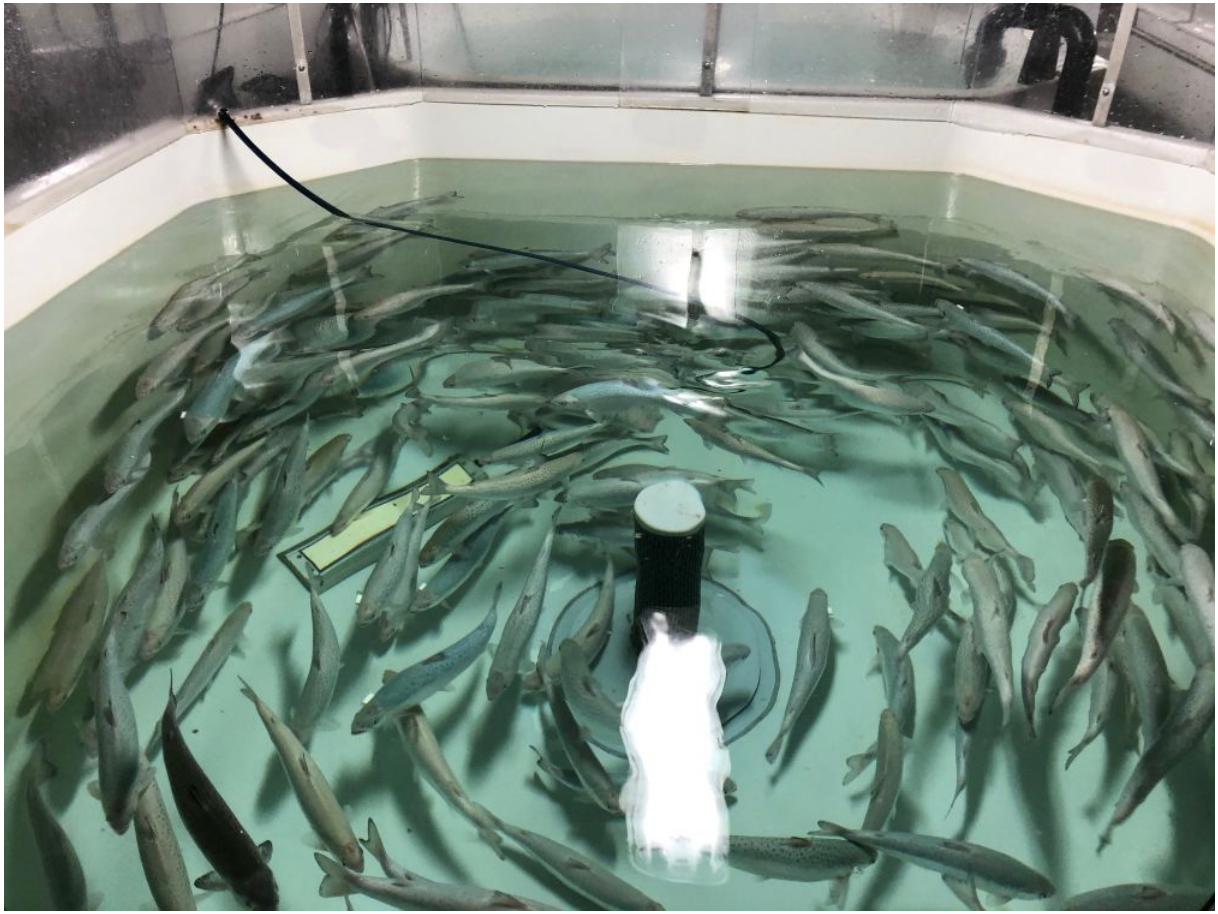

**Figure S1.** Positioning of the fish tagged with AEFishBit in the tank with non-tagged Atlantic salmon.

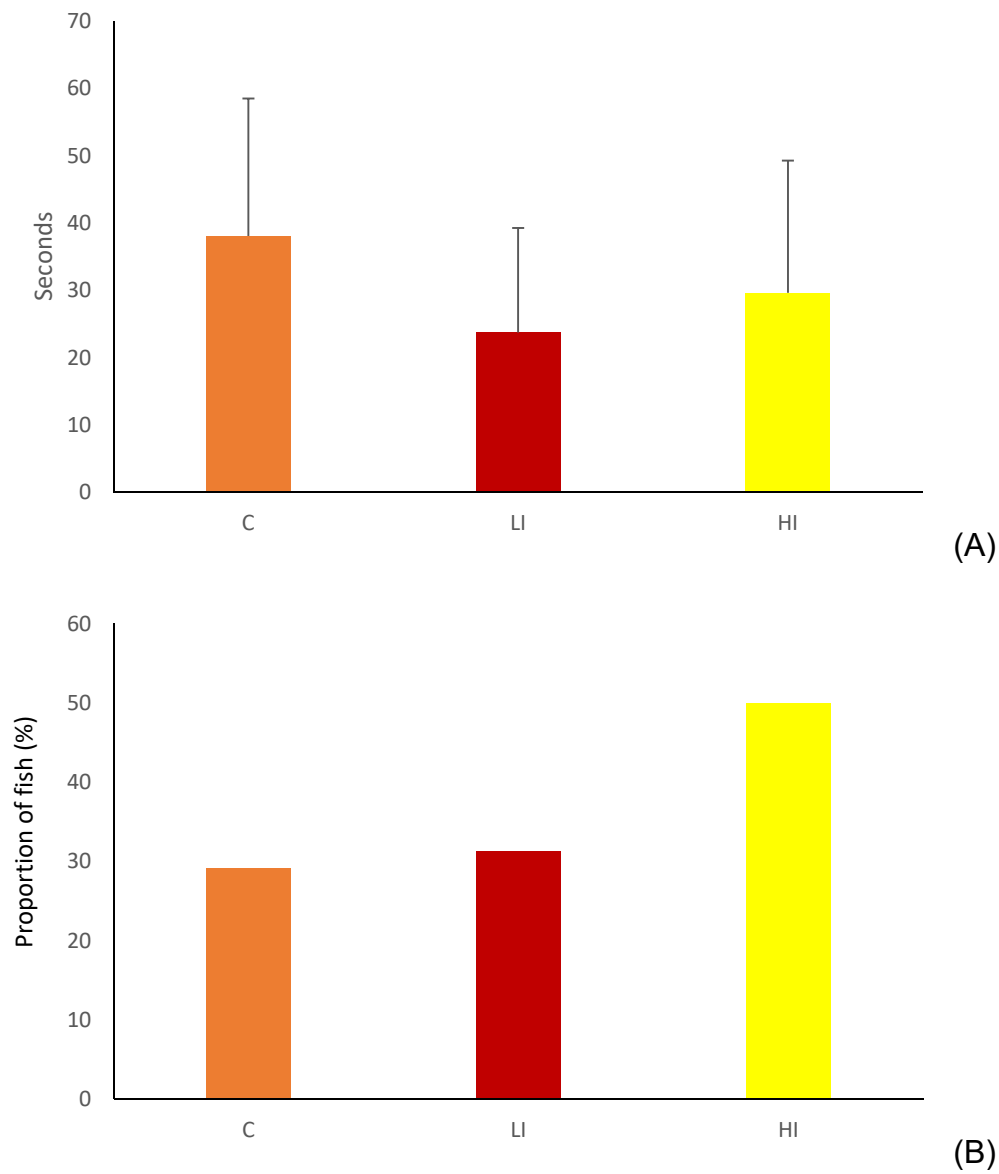

**Figure S2.** (A) Latency time (sec.) to when fish showed interest in feed pellets was monitored on D1. Data is shown as means  $\pm$  SD. NS = Not significant.  $N_C = 24$ ,  $N_{LI} = 16$ ;  $N_{HI} = 24$ . (B) Proportion (%) of fish showing no interest in feed during observed period on D1.
